# Supplementary material for: Down expression of lnc-BMP1-1 decreases that of Caveolin-1 is associated with the lung cancer susceptibility and cigarette smoking history
Source: publisher site journal article supplement (doi:10.18632/aging.102633), 2020-01-04
Supplement: Supplementary file [file aging-v12i1-102633-supplementary-material-SD1.pdf]

## SUPPLEMENTARY FIGURES

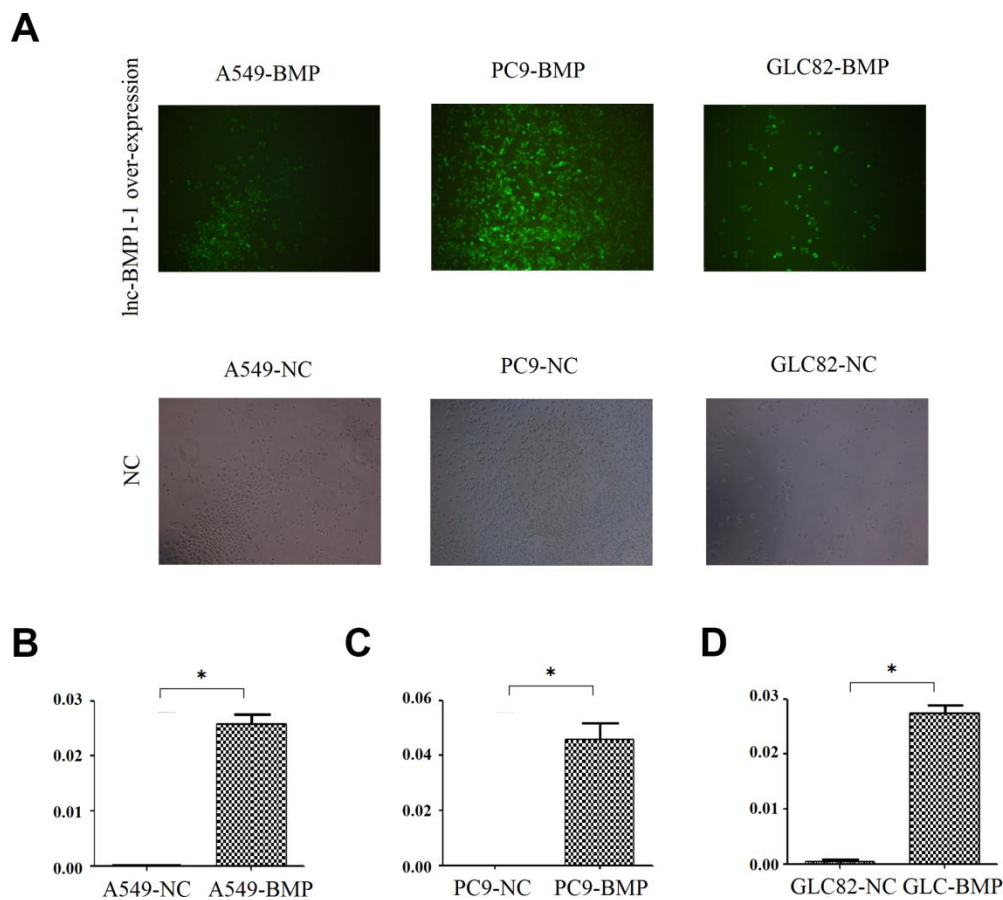

**Supplementary Figure 1. *Lnc-BMP1-1* was over-expressed in lung cancer cells.** (A) The represented fluorescence microscope pictures of A549, PC9 and GLC82 cells with *lnc-BMP1-1* over-expression, and the corresponding bar graph of (B) A549-BMP vs A549-NC cells; (C) PC9-BMP vs PC9-NC cells; (D) GLC82-BMP vs. GLC82-NC cells. Data are represented as means±SD. \*P<0.05, \*\*P<0.01.

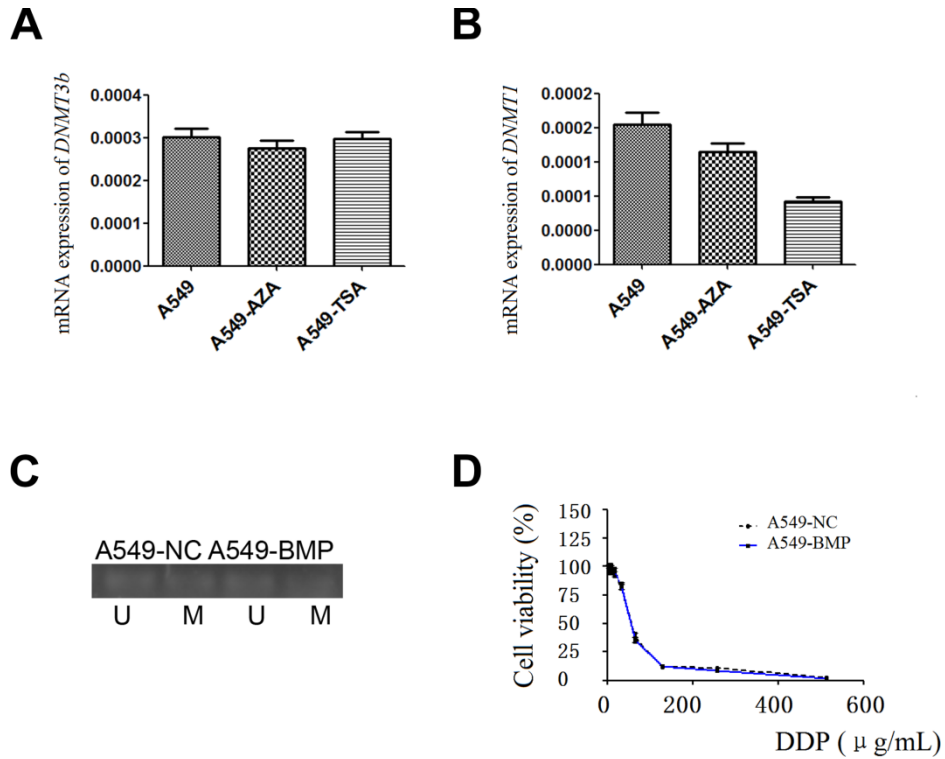

**Supplementary Figure 2. The expression of DNMTs with 5-AzaC and TSA treatment, the methylation status of Cav-1 promoter in A549-BMP vs. A549-NC cells, and the drug sensitivity trial of DDP. (A)** The expression of DNMT3bmRNA of A549 cells with 5-AzaC or TSA treatment; **(B)** The expression of DNMT1 mRNA of A549 cells with 5-AzaC or TSA treatment; **(C)** There's no significant difference between A549-BMP and A549-NC cells in the DNA methylation status of Cav-1 promoter; **(D)** There's no significant difference between A549-BMP and A549-NC cells in the cell viability under the same treatment of DDP. Data are represented as means ± SD.
